# Supplementary material for: A comparison of Prx- and OxyR-based H2O2 probes expressed in S. cerevisiae
Source: PubMed Central journal article supplement — J Biol Chem. 2021 Jun 9;297(1):100866. doi: 10.1016/j.jbc.2021.100866 (PMC8274284; doi:10.1016/j.jbc.2021.100866), 2021-06-09
Supplement: mmc1.pdf [file mmc1.pdf]

## SUPPORTING INFORMATION

### **A comparison of Prx- and OxyR-based H<sub>2</sub>O<sub>2</sub> probes expressed in *S. cerevisiae***

Paraskevi Kritsiligkou<sup>1</sup>, Tzu Keng Shen<sup>1</sup> and Tobias P. Dick<sup>1,2,\*</sup>

<sup>1</sup>German Cancer Research Center (DKFZ), DKFZ-ZMBH Alliance, Im Neuenheimer Feld 280, 69120 Heidelberg, Germany

<sup>2</sup>Faculty of Biosciences, Heidelberg University, 69120 Heidelberg, Germany

\*Corresponding author: [t.dick@dkfz.de](mailto:t.dick@dkfz.de)

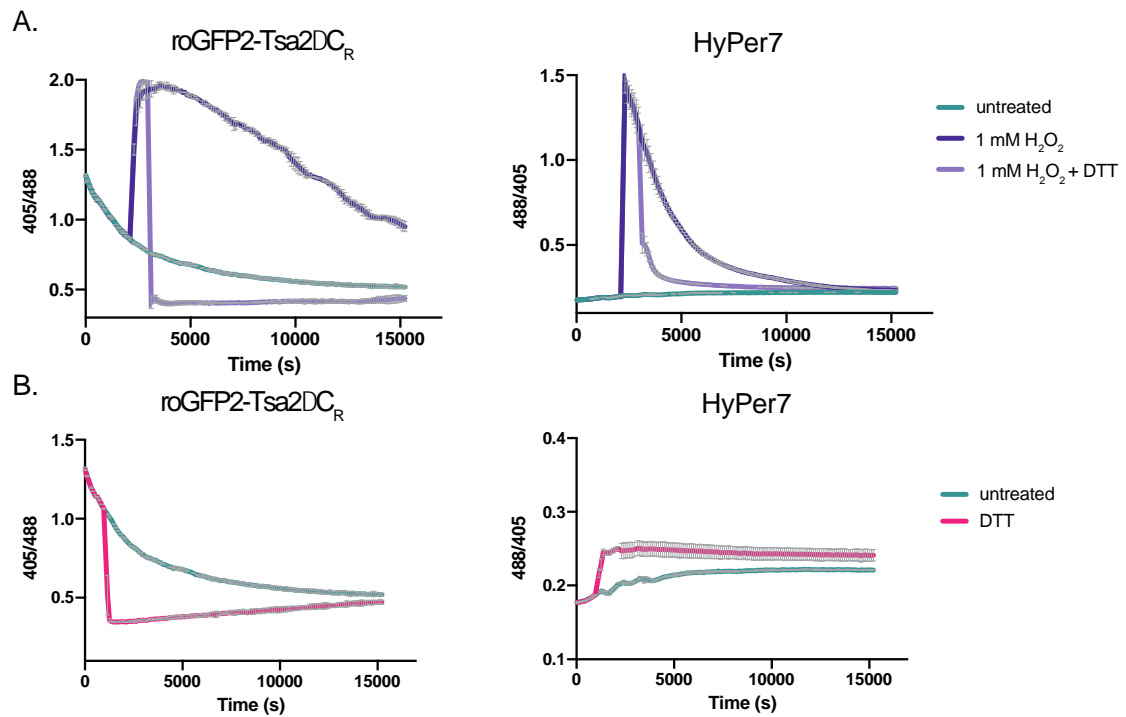

### Supplemental Figure 1: Probe responses to DTT

**A.** BY4742 cells expressing either roGFP2-Tsa2ΔC<sub>R</sub> (left panel) or HyPer7 (right panel) were treated with H<sub>2</sub>O<sub>2</sub> (1 mM) and exposed to DTT (25 mM) 10 mins later.

**B.** BY4742 cells expressing either roGFP2-Tsa2ΔC<sub>R</sub> (left panel) or HyPer7 (right panel) were exposed to DTT (25 mM) without prior H<sub>2</sub>O<sub>2</sub> treatment.

Data in this figure are representative of n=2 independent experiments with n=4 independent replicates each.

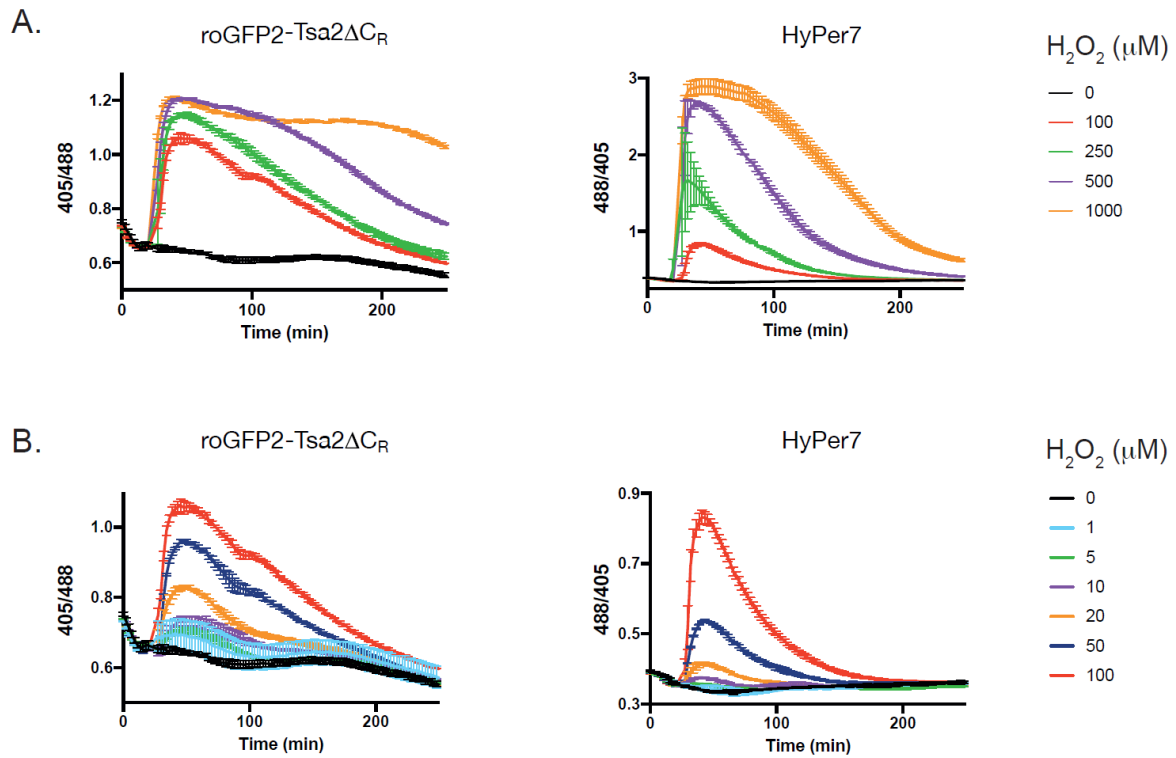

**Supplemental Figure 2: Main Figure 2 with error bars**

**A.** Response of BY4742 cells expressing either roGFP2-Tsa2 $\Delta$ C<sub>R</sub> (left panel) or HyPer7 (right panel) to exogenously applied H<sub>2</sub>O<sub>2</sub> boli in the 100-1000  $\mu$ M concentration range.

**B.** Response of BY4742 cells expressing roGFP2-Tsa2 $\Delta$ C<sub>R</sub> (left panel) or HyPer7 (right panel) to exogenously applied H<sub>2</sub>O<sub>2</sub> boli in the 1-100  $\mu$ M concentration range.

Error bars indicate the SD of 3 independent technical replicates. This figure is an extended version of main Figure 2, to exemplify variation within experiments.
